# Supplementary material
Source: Springer Nature journal article supplement (https://www.springermedizin.de/resource/supplementary/12993_2005_2_MOESM2_ESM.pdf/9616806)

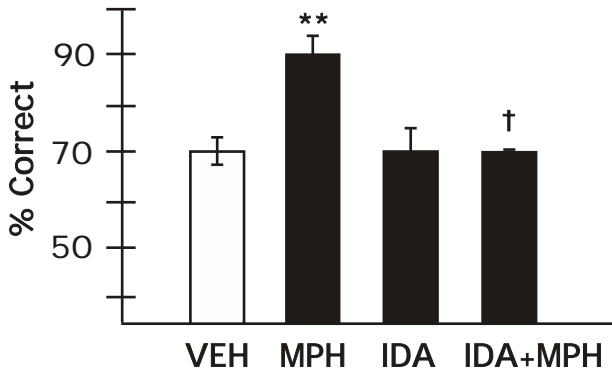

Supplement: MOESM2 [file 9616806]
